# Supplementary material
Source: PubMed Central journal article supplement (PMC7129486)
Supplement: mmc2.pdf [file mmc2.pdf]

## Protocol: LDT-betaCoV (Version 1)

### Protocol Identification

|                      |                   |                    |                     |
|----------------------|-------------------|--------------------|---------------------|
| <b>Protocol Name</b> | LDT-betaCoV       | <b>Version</b>     | 1                   |
| <b>Author</b>        | AC                | <b>Created On</b>  | 2/4/2020 2:42:49 PM |
| <b>Modified On</b>   | --                | <b>Exported On</b> | 2/4/2020 2:42:49 PM |
| <b>Description</b>   | Beta CoV protocol | <b>Type</b>        | Low - Viral (1.8)   |

### Extraction & PCR Details

|                                 |                        |                              |             |
|---------------------------------|------------------------|------------------------------|-------------|
| <b>Sample Tube Cap Type</b>     | Hologic Pierceable Cap | <b>Extraction Volume</b>     | 360 µL      |
| <b>Sample Aspiration Height</b> | Low                    | <b>Reagent Kit</b>           | FCR-S/FER-S |
| <b>Template</b>                 | RNA or DNA             | <b>Elution Buffer Volume</b> | 50 µL       |
| <b>Template Volume</b>          | 5 µL                   | <b>Enzyme Cartridge Type</b> | RNA/DNA     |

### Targets Setup

| Selected | Channel | Example Dye | Excitation/Detection Wavelength (nm) | Analyte Name | Additional Information (Optional) |
|----------|---------|-------------|--------------------------------------|--------------|-----------------------------------|
| Yes      | 1       | FAM         | 460/517                              | betaCoV      | --                                |
| No       | 2       | HEX         | 532/563                              | --           | --                                |
| No       | 3       | ROX         | 586/625                              | --           | --                                |
| No       | 4       | Quasar 670  | 625/660                              | --           | --                                |
| Yes      | 5       | Quasar 705  | 690/720                              | IC           | --                                |

# Protocol: LDT-betaCoV (Version 1)

## Thermocycler Setup

Profile: Custom

Projected Thermocycler Runtime (hh:mm:ss): 00:55:00

Stage Name 1: Holding Stage  
Number Of Cycles 1

Step Name Step 1  
Temperature (°C) 50  
Duration (mm:ss) 08:05  
Optics On No

Step Name Step 2  
Temperature (°C) 95  
Duration (mm:ss) 02:00  
Optics On No

Stage Name 2: Cycling Stage  
Number Of Cycles 44

Step Name Step 1  
Temperature (°C) 95  
Duration (mm:ss) 00:05  
Optics On No

Step Name Step 2  
Temperature (°C) 58  
Duration (mm:ss) 00:07  
Optics On No

Step Name Step 3  
Temperature (°C) 60  
Duration (mm:ss) 00:14  
Optics On Yes

## Parameters

### Curve Correction

| Channel      | Analysis Start Cycle | Baseline Correction |             |
|--------------|----------------------|---------------------|-------------|
|              |                      | Enable              | Slope Limit |
| 1-FAM        | 10                   | No                  | --          |
| 5-Quasar 705 | 10                   | No                  | --          |

### Crosstalk Correction

|              | Emit\Receive | 1      | 5 |
|--------------|--------------|--------|---|
| 1-FAM        | --           | 0.00 % |   |
| 5-Quasar 705 | 0.00 %       | --     |   |

# Protocol: LDT-betaCoV (Version 1)

## Positivity Criteria

| Channel      | Ct Threshold | Minimum Slope at Threshold |       | Maximum Ct |       |
|--------------|--------------|----------------------------|-------|------------|-------|
|              |              | Enable                     | Value | Enable     | Value |
| 1-FAM        | 1000         | No                         | --    | No         | --    |
| 5-Quasar 705 | 1000         | No                         | --    | No         | --    |

## Channel Validity Criteria

| Channel      | Minimum Background Fluorescence |       | Maximum Background Fluorescence |       | Lowest Valid Ct |       |
|--------------|---------------------------------|-------|---------------------------------|-------|-----------------|-------|
|              | Enable                          | Value | Enable                          | Value | Enable          | Value |
| 1-FAM        | No                              | --    | No                              | --    | No              | --    |
| 5-Quasar 705 | No                              | --    | No                              | --    | No              | --    |

## Sample Validity Criteria

|                                        |     |
|----------------------------------------|-----|
| Minimum of 1 positive channel required | Yes |
| Internal Control (IC) in Channel 5     | Yes |

## Export Settings

|                            |         |
|----------------------------|---------|
| Protocol Lock Status       | Off     |
| Sample Results to LIS Mode | --      |
| Revision Comments          | BetaCoV |

## Notes

--

---
